# Supplementary material
Source: PubMed Central journal article supplement (PMC7292776)
Supplement: NIHMS1585633-supplement-1.pdf [file NIHMS1585633-supplement-1.pdf]

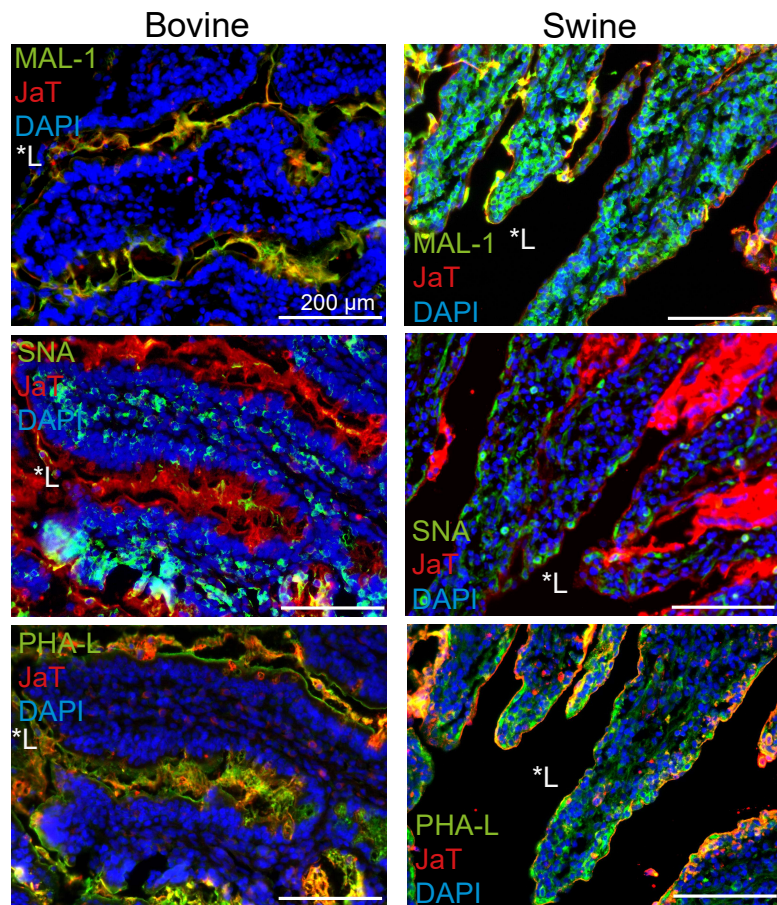

**Figure S1. Lectin-assisted mapping of glycans expressed in the bovine and swine intestines, related to Fig. 3A.** Bovine and swine intestinal tissue sections (Zyagen) were stained with MAL-1 conjugated to fluorescein (FITC), SNA conjugated to FITC, PHA-L conjugated to FITC, Javiana toxin conjugated to Alexa Fluor 555, and DAPI (DNA). \*L, Lumen.

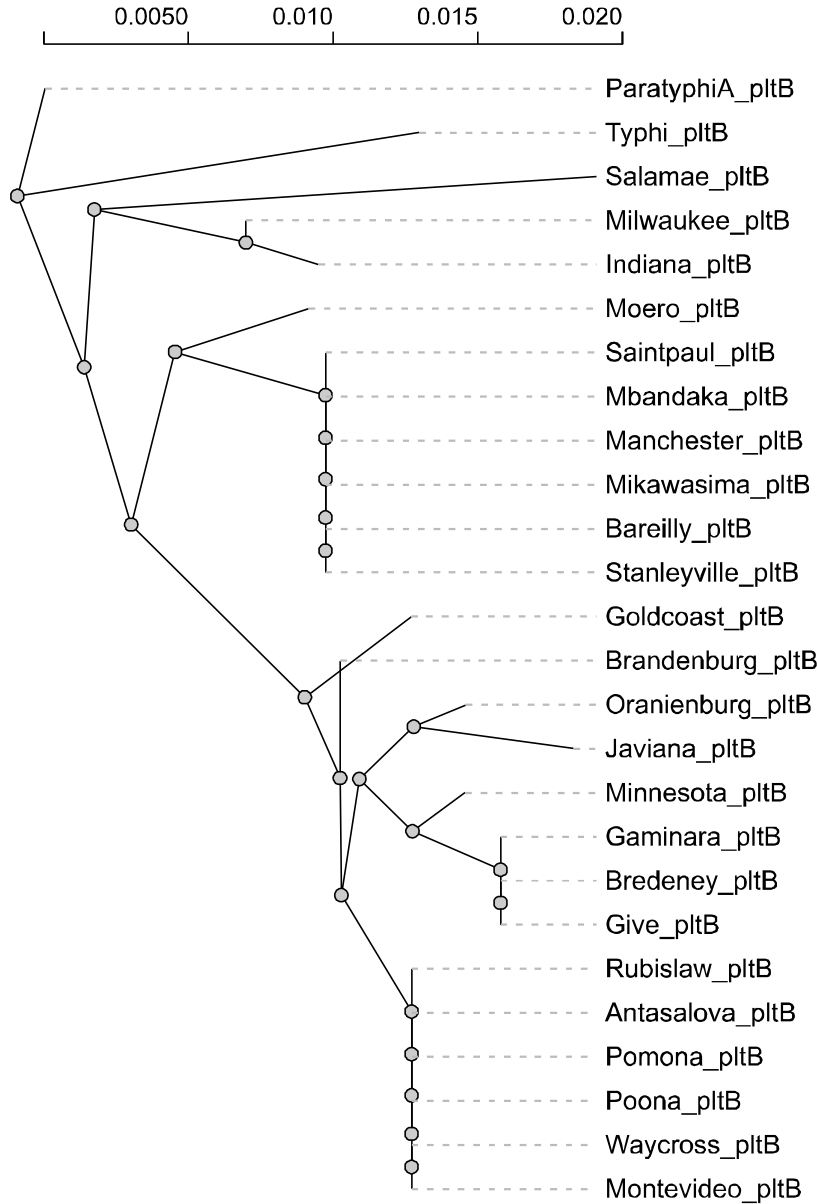

**Figure S2. Phylogram of *S. Typhi* *pltB* and its orthologues, related to Figs. 4A-C.** *Salmonella* serovars and their *pltB* sequences used in this analysis are summarized in Table S3. Distance scale is shown on the top of the figure. Note that, as shown in Table S2, *S. Typhi* *pltB* sequences are identical across the *S. Typhi* isolates identified thus far. The first hundred hits from the BLAST search using *S. Typhi* CT18 *pltB* are shown in Table S2.

**Typhi\_mPltB** EWTGDNTNAYYSDEVISELHVGQIDTSPYFCIKTVKANGSGT**P**VVACAVSKQSIWAPSFK  
 ParatyphiA\_mPltB EWTGDNTNAYYSDEVISELHVGQIDTSPYFCIKTVKANGSGTPVVACAVSKQSIWAPSFK  
 Goldcoast\_mPltB EWTGDNTNAYYSDEVISELHVGQIDTSPYFCIKTVKANGSGTPVVACAVSKQSIWAPSFK  
 Pomona\_mPltB EWTGD**K**TNAYYSDEVISELHVGQIDTSPYFCIKTVKANGSGTPVVACAVSKQSIWAPSFK  
 Antasalova\_mPltB EWTGD**K**TNAYYSDEVISELHVGQIDTSPYFCIKTVKANGSGTPVVACAVSKQSIWAPSFK  
 Bareilly\_mPltB EWTGD**K**TNAYYSDEVISELHVGQIDTSPYFCIKTVKANGSGTPVVACAVSKQSIWAPSFK  
 Stanleyville\_mPltB EWTGD**K**TNAYYSDEVISELHVGQIDTSPYFCIKTVKANGSGTPVVACAVSKQSIWAPSFK  
 Mikawasima\_mPltB EWTGD**K**TNAYYSDEVISELHVGQIDTSPYFCIKTVKANGSGTPVVACAVSKQSIWAPSFK  
 Manchester\_mPltB EWTGD**K**TNAYYSDEVISELHVGQIDTSPYFCIKTVKANGSGTPVVACAVSKQSIWAPSFK  
 Mbandaka\_mPltB EWTGD**K**TNAYYSDEVISELHVGQIDTSPYFCIKTVKANGSGTPVVACAVSKQSIWAPSFK  
 Saintpaul\_mPltB EWTGD**K**TNAYYSDEVISELHVGQIDTSPYFCIKTVKANGSGTPVVACAVSKQSIWAPSFK  
 Brandenburg\_mPltB EWTGD**K**TNAYYSDEVISELHVGQIDTSPYFCIKTVKANGSGTPVVACAVSKQSIWAPSFK  
 Waycross\_mPltB EWTGD**K**TNAYYSDEVISELHVGQIDTSPYFCIKTVKANGSGTPVVACAVSKQSIWAPSFK  
 Montevideo\_mPltB EWTGD**K**TNAYYSDEVISELHVGQIDTSPYFCIKTVKANGSGTPVVACAVSKQSIWAPSFK  
 Rubislaw\_mPltB EWTGD**K**TNAYYSDEVISELHVGQIDTSPYFCIKTVKANGSGTPVVACAVSKQSIWAPSFK  
 Poona\_mPltB EWTGD**K**TNAYYSDEVISELHVGQIDTSPYFCIKTVKANGSGTPVVACAVSKQSIWAPSFK  
**Javiana\_mPltB** EWTGD**K**TNAYYSDEVISELHVGQIDT**G**PYFCIKTVKANGSGT**P**VVACAVSKQSIWAPSFK  
 Oranienburg\_mPltB EWTGD**K**TNAYYSDEVISELHVGQIDT**G**PYFCIKTVKANGSGTPVVACAVSKQSIWAPSFK  
 Bredeney\_mPltB EWTGD**K**TNAYYSDEVI**S**ELHVGQIDTSPYFCIKTVKANGSGTPVVACAVSKQSIWAPSFK  
 Give\_mPltB EWTGD**K**TNAYYSDEVI**S**ELHVGQIDTSPYFCIKTVKANGSGTPVVACAVSKQSIWAPSFK  
 Gaminara\_mPltB EWTGD**K**TNAYYSDEVI**S**ELHVGQIDTSPYFCIKTVKANGSGTPVVACAVSKQSIWAPSFK  
 Minnesota\_mPltB EWTGD**K**TNAYYSDEVI**S**ELHVGQIDTSPYFCIKTVKANGSGTPVVACAVSKQSIWAPSFK  
 Milwaukee\_mPltB EWTGDNTNAYYSDEVISELHVGQIDTSPYFCIKTVKANGSGTPVVACAVSKQSIWAPSFK  
 Indiana\_mPltB EWTGDNTNAYYSDEVISELHVGQIDTSPYFCIKTVKANGSGTPVVACAVSKQSIWAPSFK  
 Moero\_mPltB EWTGD**K**TNAYYSDEVISELHVGQIDTSPYFCIKTVKANGSGTPVVACAVSKQSIWAPSFK  
 Salamae\_mPltB EWTGDNTNAYYSDEVISELHVGQIDTSPYFCIKTVKANGSGTPVVACA**L**A**K**QSIWAPSFK  
 \*\*\*\*\*:\*\*\*\*\*:\*\*\*\*\*.\*\*\*\*\* \*\*\*\*\*:\*\*\*\*\*

**Typhi\_mPltB** ELLDQARYFYSTGQSVRIHVQKNIWTYPLFVNTFSANALVGLSSCSATQCFGPK  
 ParatyphiA\_mPltB ELLDQARYFYSTGQSVRIHVQKNIWTYPLFVNTFSANALVGLSSCSATQCFGPK  
 Goldcoast\_mPltB ELLDQARYFYSTGQSVRIHVQKNIWTYPLFVNTFSANALVGLSSCSATQCFGPK  
 Pomona\_mPltB ELLDQARYFYSTGQSVRIHVQKNIWTYPLFVNTFSANALVGLSSCSATQCFGPK  
 Antasalova\_mPltB ELLDQARYFYSTGQSVRIHVQKNIWTYPLFVNTFSANALVGLSSCSATQCFGPK  
 Bareilly\_mPltB ELLDQARYFYSTGQSVRIHVQKNIWTYPLFVNTFSANALVGLSSCSATQCFGPK  
 Stanleyville\_mPltB ELLDQARYFYSTGQSVRIHVQKNIWTYPLFVNTFSANALVGLSSCSATQCFGPK  
 Mikawasima\_mPltB ELLDQARYFYSTGQSVRIHVQKNIWTYPLFVNTFSANALVGLSSCSATQCFGPK  
 Manchester\_mPltB ELLDQARYFYSTGQSVRIHVQKNIWTYPLFVNTFSANALVGLSSCSATQCFGPK  
 Mbandaka\_mPltB ELLDQARYFYSTGQSVRIHVQKNIWTYPLFVNTFSANALVGLSSCSATQCFGPK  
 Saintpaul\_mPltB ELLDQARYFYSTGQSVRIHVQKNIWTYPLFVNTFSANALVGLSSCSATQCFGPK  
 Brandenburg\_mPltB ELLDQARYFYSTGQSVRIHVQKNIWTYPLFVNTFSANALVGLSSCSATQCFGPK  
 Waycross\_mPltB ELLDQARYFYSTGQSVRIHVQKNIWTYPLFVNTFSANALVGLSSCSATQCFGPK  
 Montevideo\_mPltB ELLDQARYFYSTGQSVRIHVQKNIWTYPLFVNTFSANALVGLSSCSATQCFGPK  
 Rubislaw\_mPltB ELLDQARYFYSTGQSVRIHVQKNIWTYPLFVNTFSANALVGLSSCSATQCFGPK  
 Poona\_mPltB ELLDQARYFYSTGQSVRIHVQKNIWTYPLFVNTFSANALVGLSSCSATQCFGPK  
**Javiana\_mPltB** ELLDQARYFYSTGQSVRIHVQKNIWTYPLFVNTFSANALVGLSSCSATQCFGPK  
 Oranienburg\_mPltB ELLDQARYFYSTGQSVRIHVQKNIWTYPLFVN**A**FSANALVGLSSCSATQCFGPK  
 Bredeney\_mPltB ELLDQARYFYSTGQSVRIHVQKNIWTYPLFVNTFSANALVGLSSCSATQCFGPK  
 Give\_mPltB ELLDQARYFYSTGQSVRIHVQKNIWTYPLFVNTFSANALVGLSSCSATQCFGPK  
 Gaminara\_mPltB ELLDQARYFYSTGQSVRIHVQKNIWTYPLFVNTFSANALVGLSSCSATQCFGPK  
 Minnesota\_mPltB ELLDQARYFYSTGQSVRIHVQKNIWTYPLFVN**A**FSANALVGLSSCSATQCFGPK  
 Milwaukee\_mPltB ELLDQARYFYSTGQSVRIHVQKNIWTYPLFVNTFSANALVGLSSCS**T**TQCFGPK  
 Indiana\_mPltB ELLDQARYFYSTGQSVRIHVQKNIWTYPLFVNTFSANALVGLSSCS**T**TQCFGPK  
 Moero\_mPltB ELLDQARYFYSTGQSVRIHVQKNIWTYPLFVNTFSANALVGLSSCS**T**TQCFGPK  
 Salamae\_mPltB ELLDQARYFYSTGQSVRIHVQKNIWTYPLFVNTFSANALVGLSSCSATQCFGPK  
 \*\*:\*\*\*\*\*:\*\*\*\*\*:\*\*\*\*\*:\*\*\*\*\*:\*\*\*\*\*:\*\*\*\*\*

**Figure S3. Mature PltB amino acid sequence comparison analysis of *S. Typhi* PltB and its orthologues, related to Figs. 4A-C.** Amino acid residues evaluated in this study are highlighted in bold red. Amino acid variations that are seen in *S. Javiana* PltB are indicated in grey, while amino acid variations that are not seen in *S. Javiana* PltB are indicated in green.

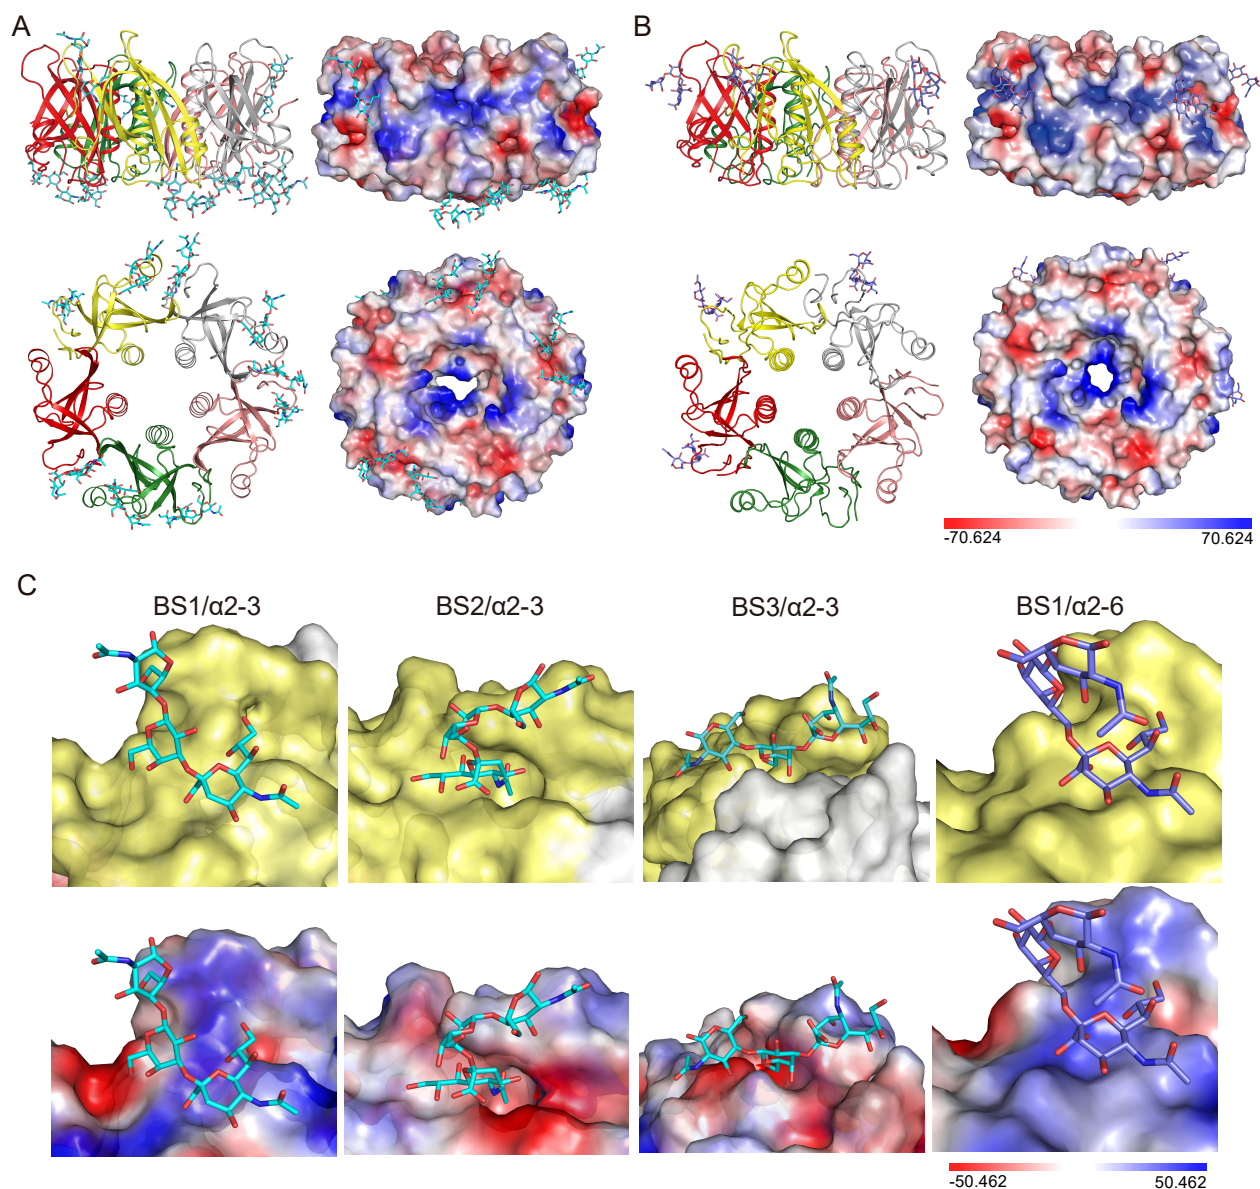

**Figure S4. Crystal structures of *S. Typhi* PltB bound to specific glycan moieties, related to Figs. 5A-H.** **A**, Crystal structure of typhoid toxin PltB pentamer in complex with Neu5Ac- $\alpha$ 2-3-Gal- $\beta$ 1-4-GlcNAc (Cyan sticks, sugar carbon atoms; blue sticks, nitrogen atoms; red sticks, oxygen atoms) is shown as a ribbon cartoon with each protomer depicted in a different color (side view, top left; bottom view, bottom left in A). Surface charge distribution of the PltB pentamer structure and Neu5Ac- $\alpha$ 2-3-Gal- $\beta$ 1-4-GlcNAc (side view, top right; bottom view, bottom right in A). **B**, Ribbon diagrams (left) and surface charge distributions (right) of crystal structure of typhoid toxin PltB pentamer in complex with Neu5Ac- $\alpha$ 2-6-Gal- $\beta$ 1-4-GlcNAc (Purple sticks, sugar carbon atoms; blue sticks, nitrogen atoms; red sticks, oxygen atoms). **C**, Close-up views (top panels) and surface charge distributions (bottom panels) of the binding sites 1-3 (BS1-3) of PltB in complex with Neu5Ac- $\alpha$ 2-3-Gal- $\beta$ 1-4-GlcNAc or Neu5Ac- $\alpha$ 2-6-Gal- $\beta$ 1-4-GlcNAc.

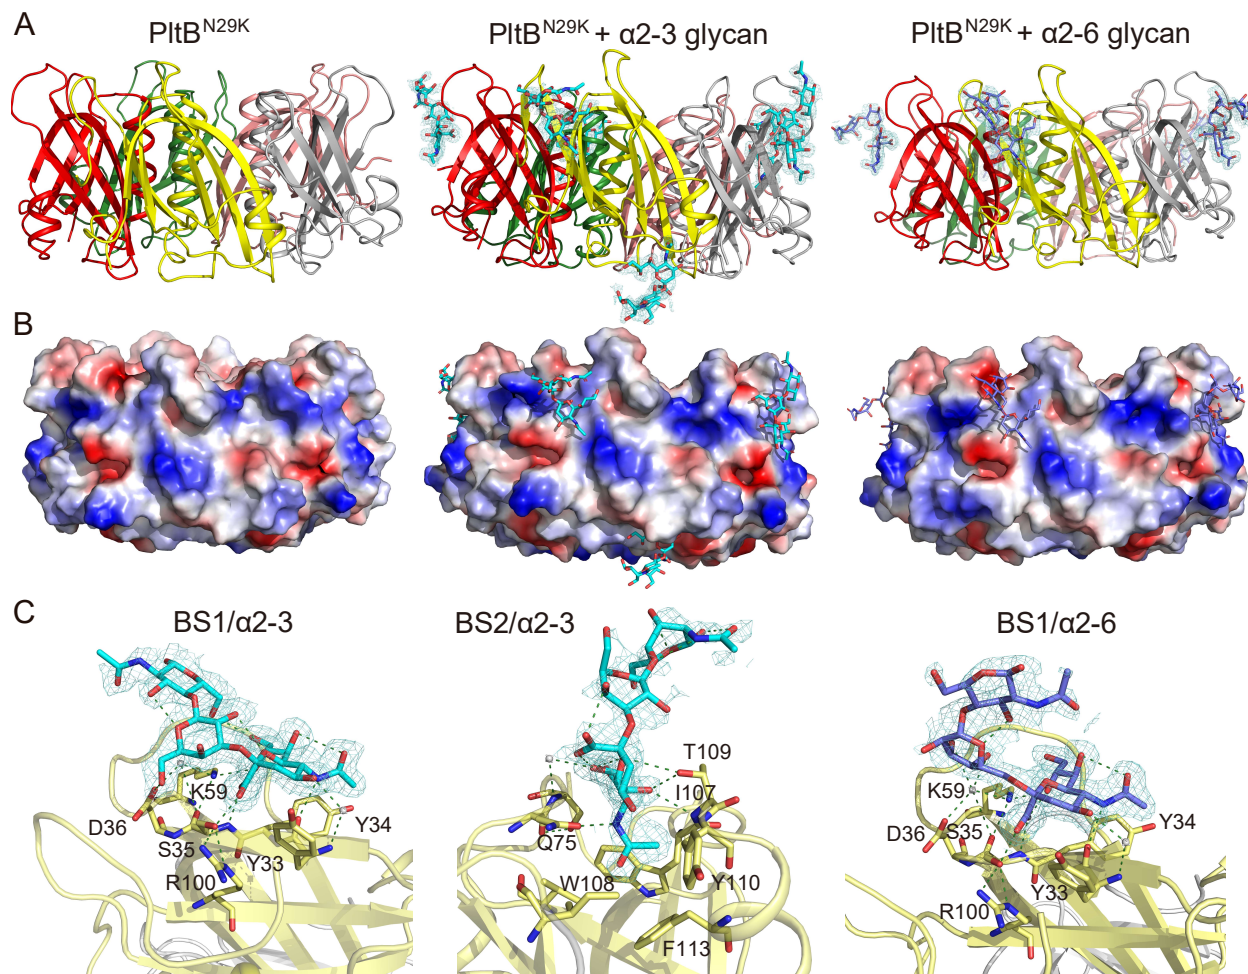

**Figure S5. Crystal structures of PltB<sup>N29K</sup> native and PltB<sup>N29K</sup> bound to specific glycan moieties, related to Fig. 6A.** **A**, Crystal structures of PltB<sup>N29K</sup> pentamer (left), PltB<sup>N29K</sup> in complex with Neu5Ac- $\alpha$ 2-3-Gal- $\beta$ 1-4-GlcNAc (middle) or Neu5Ac- $\alpha$ 2-6-Gal- $\beta$ 1-4-GlcNAc (right) are shown as ribbon cartoons with each protomer depicted in a different color. **B**, Surface charge distributions of corresponding crystal structures shown in **A**. **C**, Close-up views of the binding sites (BS) 1 and 2 of PltB<sup>N29K</sup> in complex with Neu5Ac- $\alpha$ 2-3-Gal- $\beta$ 1-4-GlcNAc or Neu5Ac- $\alpha$ 2-6-Gal- $\beta$ 1-4-GlcNAc.

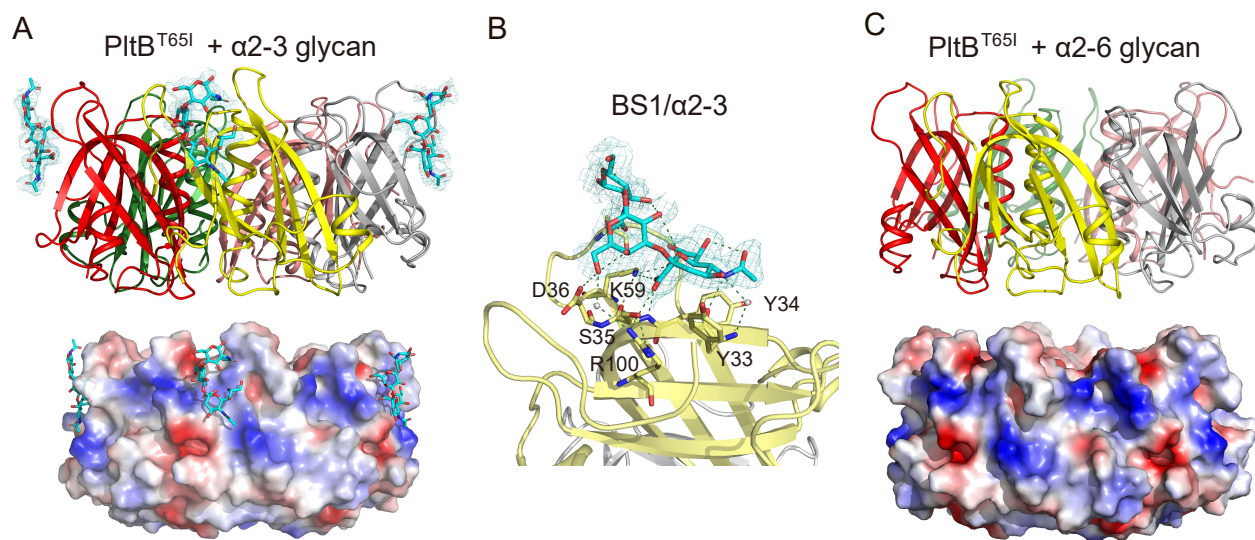

**Figure S6. Crystal structures of PltB<sup>T65I</sup> native and PltB<sup>T65I</sup> bound to specific glycan moieties, related to Fig. 6C.** **A**, Crystal structures of PltB<sup>T65I</sup> in complex with Neu5Ac-α2-3-Gal-β1-4-GlcNAc (ribbon cartoon, top; surface charge distribution, bottom). **B**, Close-up view of the binding sites (BS) 1 of PltB<sup>T65I</sup> in complex with Neu5Ac-α2-3-Gal-β1-4-GlcNAc. In the PltB<sup>T65I</sup> crystal that we solved its structure, we observed symmetry mates that hindered the binding of the α2-3 glycan to the BS2 and 3, which is consistent with data shown in Figures 4C and 5 indicating that there is no reason for not having α2-3 glycan on the BP2 and 3 of PltB<sup>T65I</sup>. **C**, Ribbon cartoon and surface charge distribution of the crystal structure of PltB<sup>T65I</sup> soaked for 20 hrs in a crystallization condition buffer containing Neu5Ac-α2-6-Gal-β1-4-GlcNAc.

**Table S2. *S. Typhi* *pltB* sequences used in this study, related to Figs. 4A-C.** Shown are the first 100 hits from the BLAST search using *S. Typhi* CT18 *pltB*.

| Serovar | Strain              | Sequence ID | Start   | End     | Length | Identity (%) |
|---------|---------------------|-------------|---------|---------|--------|--------------|
| Typhi   | CT18                | Sty1891     | 1788687 | 1788274 | 414    | 100          |
| Typhi   | R19_2839            | CP046429.1  | 2684230 | 2683817 | 414    | 100          |
| Typhi   | 2018K-0756          | CP044007.1  | 2313144 | 2312731 | 414    | 100          |
| Typhi   | WGS1146             | CP040575.1  | 2684661 | 2684248 | 414    | 100          |
| Typhi   | Ty2 4316STDY6559669 | LR590081.1  | 2568088 | 2567675 | 414    | 100          |
| Typhi   | 311189_217186       | CP029646.1  | 1787549 | 1787136 | 414    | 100          |
| Typhi   | 311189_201186       | CP029958.1  | 1787568 | 1787155 | 414    | 100          |
| Typhi   | 311189_218186       | CP029925.1  | 1788480 | 1788067 | 414    | 100          |
| Typhi   | 343078_273110       | CP029846.1  | 1787719 | 1787306 | 414    | 100          |
| Typhi   | 343078_256191       | CP029959.1  | 1726503 | 1726090 | 414    | 100          |
| Typhi   | 343078_251131       | CP029960.1  | 1788099 | 1787686 | 414    | 100          |
| Typhi   | 343078_228140       | CP029962.1  | 1787808 | 1787395 | 414    | 100          |
| Typhi   | 343078_223175       | CP029964.1  | 1787907 | 1787494 | 414    | 100          |
| Typhi   | 343078_211126       | CP029848.1  | 1787796 | 1787383 | 414    | 100          |
| Typhi   | 343078_203125       | CP029850.1  | 1787691 | 1787278 | 414    | 100          |
| Typhi   | 343078_201101       | CP029852.1  | 1788012 | 1787599 | 414    | 100          |
| Typhi   | 343077_292148       | CP029855.1  | 1787884 | 1787471 | 414    | 100          |
| Typhi   | 343077_286126       | CP029856.1  | 1787067 | 1786654 | 414    | 100          |
| Typhi   | 343077_285138       | CP029858.1  | 1787839 | 1787426 | 414    | 100          |
| Typhi   | 343077_281186       | CP029853.1  | 1726037 | 1725624 | 414    | 100          |
| Typhi   | 343077_278127       | CP029863.1  | 1787499 | 1787086 | 414    | 100          |
| Typhi   | 343077_267164       | CP029906.1  | 1790717 | 1790304 | 414    | 100          |
| Typhi   | 343077_260153       | CP029861.1  | 1787799 | 1787386 | 414    | 100          |
| Typhi   | 343077_255118       | CP029907.1  | 1790401 | 1789988 | 414    | 100          |
| Typhi   | 343077_228157       | CP029864.1  | 1787663 | 1787250 | 414    | 100          |
| Typhi   | 343077_228140       | CP029866.1  | 1827555 | 1827142 | 414    | 100          |
| Typhi   | 343077_215174       | CP029868.1  | 1790707 | 1790294 | 414    | 100          |
| Typhi   | 343077_214162       | CP029862.1  | 1788094 | 1787681 | 414    | 100          |
| Typhi   | 343077_214135       | CP029872.1  | 1787901 | 1787488 | 414    | 100          |
| Typhi   | 343077_213147       | CP029897.1  | 1882683 | 1882270 | 414    | 100          |
| Typhi   | 343077_212159       | CP029870.1  | 1726862 | 1726449 | 414    | 100          |
| Typhi   | 343077_212138       | CP029919.1  | 1790394 | 1789981 | 414    | 100          |
| Typhi   | 343077_211171       | CP029873.1  | 1787670 | 1787257 | 414    | 100          |
| Typhi   | 343076_294172       | CP029888.1  | 1788337 | 1787924 | 414    | 100          |
| Typhi   | 343076_269157       | CP029881.1  | 1827552 | 1827139 | 414    | 100          |
| Typhi   | 343076_253155       | CP029890.1  | 1827830 | 1827417 | 414    | 100          |
| Typhi   | 343076_252143       | CP029892.1  | 1787952 | 1787539 | 414    | 100          |
| Typhi   | 343076_249107       | CP029913.1  | 1787807 | 1787394 | 414    | 100          |
| Typhi   | 343076_248190       | CP029882.1  | 1789926 | 1789513 | 414    | 100          |
| Typhi   | 343076_241106       | CP029899.1  | 1790429 | 1790016 | 414    | 100          |
| Typhi   | 343076_232188       | CP029900.1  | 1787868 | 1787455 | 414    | 100          |

|       |                                |            |         |         |     |     |
|-------|--------------------------------|------------|---------|---------|-----|-----|
| Typhi | 343076_227128                  | CP029875.1 | 1787865 | 1787452 | 414 | 100 |
| Typhi | 311189_282186                  | CP029920.1 | 1787761 | 1787348 | 414 | 100 |
| Typhi | 343076_217103                  | CP029914.1 | 1790493 | 1790080 | 414 | 100 |
| Typhi | 343076_202113                  | CP029915.1 | 1787839 | 1787426 | 414 | 100 |
| Typhi | 311189_291186                  | CP029894.1 | 1787546 | 1787133 | 414 | 100 |
| Typhi | 311189_269186                  | CP029922.1 | 1787670 | 1787257 | 414 | 100 |
| Typhi | 311189_268186                  | CP029883.1 | 1787273 | 1786860 | 414 | 100 |
| Typhi | 311189_268103                  | CP029902.1 | 1832789 | 1832376 | 414 | 100 |
| Typhi | 311189_256186                  | CP029917.1 | 1787985 | 1787572 | 414 | 100 |
| Typhi | 311189_255186                  | CP029885.1 | 1787948 | 1787535 | 414 | 100 |
| Typhi | 311189_252186                  | CP029896.1 | 1787765 | 1787352 | 414 | 100 |
| Typhi | 311189_239103                  | CP029908.1 | 1789500 | 1789087 | 414 | 100 |
| Typhi | 311189_232103                  | CP029918.1 | 1789005 | 1788592 | 414 | 100 |
| Typhi | 311189_231186                  | CP029904.1 | 1787588 | 1787175 | 414 | 100 |
| Typhi | 311189_224186                  | CP029878.1 | 1787585 | 1787172 | 414 | 100 |
| Typhi | 311189_223186                  | CP029880.1 | 1788850 | 1788437 | 414 | 100 |
| Typhi | 311189_222186                  | CP029909.1 | 1828203 | 1827790 | 414 | 100 |
| Typhi | 311189_221186                  | CP029923.1 | 1787191 | 1786778 | 414 | 100 |
| Typhi | 311189_220186                  | CP029886.1 | 1787992 | 1787579 | 414 | 100 |
| Typhi | 311189_219186                  | CP029911.1 | 1787778 | 1787365 | 414 | 100 |
| Typhi | 311189_217103                  | CP029927.1 | 1789682 | 1789269 | 414 | 100 |
| Typhi | 311189_216103                  | CP029928.1 | 1828252 | 1827839 | 414 | 100 |
| Typhi | 311189_215186                  | CP029930.1 | 1787043 | 1786630 | 414 | 100 |
| Typhi | 311189_214186                  | CP029933.1 | 1787624 | 1787211 | 414 | 100 |
| Typhi | 311189_213186                  | CP029936.1 | 1787792 | 1787379 | 414 | 100 |
| Typhi | 311189_212186                  | CP029944.1 | 1788004 | 1787591 | 414 | 100 |
| Typhi | 311189_211186                  | CP029945.1 | 1790441 | 1790028 | 414 | 100 |
| Typhi | 311189_210186                  | CP029946.1 | 1787772 | 1787359 | 414 | 100 |
| Typhi | 311189_209186                  | CP029952.1 | 1787691 | 1787278 | 414 | 100 |
| Typhi | 311189_208186                  | CP029949.1 | 1787768 | 1787355 | 414 | 100 |
| Typhi | 311189_208103                  | CP029932.1 | 1788052 | 1787639 | 414 | 100 |
| Typhi | 311189_207186                  | CP029938.1 | 1726111 | 1725698 | 414 | 100 |
| Typhi | 311189_206186                  | CP029940.1 | 1789029 | 1788616 | 414 | 100 |
| Typhi | 311189_205186                  | CP029950.1 | 1787384 | 1786971 | 414 | 100 |
| Typhi | 311189_204186                  | CP029954.1 | 1787710 | 1787297 | 414 | 100 |
| Typhi | 311189_203186                  | CP029942.1 | 1787052 | 1786639 | 414 | 100 |
| Typhi | 311189_202186                  | CP029956.1 | 1827716 | 1827303 | 414 | 100 |
| Typhi | Ty21a                          | CP023975.1 | 2176424 | 2176837 | 414 | 100 |
| Typhi | LXYSH                          | CP030936.1 | 4243329 | 4243742 | 414 | 100 |
| Typhi | OVG_041                        | LT906560.1 | 516042  | 515629  | 414 | 100 |
| Typhi | SGB90                          | LT904870.2 | 2806254 | 2805841 | 414 | 100 |
| Typhi | ISP_03_07467_SGB110-sc-1979083 | LT905060.2 | 2662091 | 2661678 | 414 | 100 |
| Typhi | 1036491                        | LT906495.1 | 2657594 | 2657181 | 414 | 100 |
| Typhi | ERL024120                      | LT906494.1 | 509382  | 509795  | 414 | 100 |



|       |                         |            |         |         |     |     |
|-------|-------------------------|------------|---------|---------|-----|-----|
| Typhi | 1554-sc-2165329         | LT906493.1 | 2657605 | 2657192 | 414 | 100 |
| Typhi | E98_3139-sc-1927833     | LT905143.1 | 2366618 | 2367031 | 414 | 100 |
| Typhi | H12ESR00755-001A        | LT905142.1 | 369292  | 368879  | 414 | 100 |
| Typhi | OVG_041                 | LT905141.1 | 1896510 | 1896923 | 414 | 100 |
| Typhi | ERL082356               | LT905140.1 | 2441262 | 2441675 | 414 | 100 |
| Typhi | 2010-007898             | LT905139.1 | 2657610 | 2657197 | 414 | 100 |
| Typhi | ty3-243                 | LT905090.1 | 4566056 | 4566469 | 414 | 100 |
| Typhi | ERL024120               | LT905088.1 | 1520236 | 1520649 | 414 | 100 |
| Typhi | 1554-sc-2165329         | LT905064.1 | 2657555 | 2657142 | 414 | 100 |
| Typhi | lupe_GEN0059-sc-1979081 | LT905063.1 | 2072707 | 2073120 | 414 | 100 |
| Typhi | 403Ty-sc-1979084        | LT905062.1 | 4644368 | 4644781 | 414 | 100 |
| Typhi | ERL12960                | LT904894.1 | 2657509 | 2657096 | 414 | 100 |
| Typhi | 1016889                 | LT904893.1 | 2657582 | 2657169 | 414 | 100 |
| Typhi | 80-2002                 | LT904891.1 | 4585640 | 4586053 | 414 | 100 |
| Typhi | H12ESR00394-001A        | LT904890.1 | 2060046 | 2060459 | 414 | 100 |
| Typhi | 129-0238-M              | LT904888.1 | 4564955 | 4565368 | 414 | 100 |

---

**Table S3. *Salmonella* *pltB* sequences used in the sequence comparison and phylogram study, related to Figs. 4A-C.**

| <b>Serovar</b> | <b>Strain</b> | <b>Sequence ID</b> | <b>Gene location</b> | <b>Identity<br/>(matched/total nt)</b> |
|----------------|---------------|--------------------|----------------------|----------------------------------------|
| Typhi          | CT18          | Sty1891            | 1788274 - 1788687    | 414/414                                |
| ParatyphiA     | ATCC 11511    | CP019185.1         | 2124946 - 2125359    | 408/414                                |
| Javiana        | CFSAN001992   | CP004027           | 1038518 - 1038931    | 400/414                                |
| Minnesota      | ATCC 49284    | CP019184.1         | 2578989 - 2579402    | 401/414                                |
| Gaminara       | CFSAN070644   | CP024165.1         | 2739327 - 2739740    | 401/414                                |
| Give           | CFSAN024229   | CP019174.1         | 2732040 - 2732453    | 401/414                                |
| Oranienburg    | CFSAN001285   | CP019197.1         | 2655115 - 2655528    | 401/414                                |
| Salamae        | N/A           | LS483456.1         | 3180621 - 3181034    | 401/414                                |
| Bredeney       | NCTC6026      | LS483481.1         | 2600268 - 2600681    | 401/414                                |
| Rubislaw       | ATCC 10717    | CP019192.1         | 2608673 - 2609086    | 402/414                                |
| Antsalova      | S01-0511      | CP019116.1         | 1219075 - 1219488    | 402/414                                |
| Montevideo     | CFSAN051296   | CP029336.1         | 2722398 - 2722811    | 402/414                                |
| Pomona         | ATCC 10729    | CP019186.1         | 2519059 - 2519472    | 402/414                                |
| Poona          | ATCC BAA-1673 | CP019189.1         | 2675112 - 2675525    | 402/414                                |
| Waycross       | RSE24         | CP034707.1         | 2576749 - 2577162    | 402/414                                |
| Brandenburg    | SA20113174    | CP029999.1         | 2636161 - 2636574    | 403/414                                |
| Goldcoast      | NCTC13175     | LR134158.1         | 2227697 - 2228110    | 403/414                                |
| Saintpaul      | SARA26        | CP017727.1         | 1978960 - 1979373    | 404/414                                |
| Mbandaka       | ATCC 51958    | CP019183.1         | 2813181 - 2813594    | 404/414                                |
| Manchester     | ST278         | CP019414.1         | 1213378 - 1213791    | 404/414                                |
| Mikawasima     | RSE13         | CP034715.1         | 2637938 - 2638351    | 404/414                                |
| Stanleyville   | RSE10         | CP034716.1         | 1959439 - 1959852    | 404/414                                |
| Moero          | RES29         | CP034705.1         | 2614796 - 2615209    | 404/414                                |
| Bareilly       | RSE03         | CP034721.1         | 1965862 - 1966275    | 404/414                                |
| Indiana        | D90           | CP022450.1         | 2756648 - 2757061    | 405/414                                |
| Milwaukee      | SA19950795    | CP030175.1         | 1950681 - 1951094    | 406/414                                |

**Table S4. Crystallization and glycan soaking conditions for typhoid toxin PltB, related to Figs. 5 and 6.**

| PDB ID | Protein              | Conc. (mg/ml) | Crystallization condition  | Glycan              | Soaking condition   | Cryo-protection     |
|--------|----------------------|---------------|----------------------------|---------------------|---------------------|---------------------|
| *      | PltB                 | 5.1           | 26% PEG1500,               | No                  |                     | No                  |
| 6P4M   | PltB                 | 5.1           | Sodium acetate pH 4.4      | $\alpha$ 2-3 glycan | 5 mM, 2hr, RT       | No                  |
| 6P4N   | PltB                 | 5.1           |                            | $\alpha$ 2-6 glycan | 5 mM, 2hr, RT       | No                  |
| 6P4P   | PltB <sup>N29K</sup> | 5.7           | 25% PEG1500,               | No                  |                     | 20% Ethylene glycol |
| 6P4Q   | PltB <sup>N29K</sup> | 5.7           | Sodium acetate pH 4.4      | $\alpha$ 2-3 glycan | 5 mM, 2hr, RT       | 20% Ethylene glycol |
| 6P4R   | PltB <sup>N29K</sup> | 5.7           |                            | $\alpha$ 2-6 glycan | 5 mM, 2hr, RT       | 20% Ethylene glycol |
| 6P4S   | PltB <sup>T65I</sup> | 8.3           | 0.2M Sodium Chloride       | No                  |                     | 20% Ethylene glycol |
| 6P4T   | PltB <sup>T65I</sup> | 8.3           | 0.1M Sodium Acetate pH 4.5 | $\alpha$ 2-3 glycan | 5 mM, 2hr, RT       | 20% Ethylene glycol |
| *      | PltB <sup>T65I</sup> | 8.3           | 1.26M Ammonium sulfate     | $\alpha$ 2-6 glycan | 5 mM, 2hr, RT       | 20% Ethylene glycol |
| *      | PltB <sup>T65I</sup> | 8.3           |                            | $\alpha$ 2-6 glycan | 5 mM, overnight, RT | 20% Ethylene glycol |

\* Structure not deposit due to similarity to the corresponding apo structures.

**Table S5. X-ray data collection and refinement statistics for the *S. Typhi* PltB structures, related to Figs. 5 and 6.**

|                                                      | PltB WT<br>with $\alpha$ 2-3<br>glycan        | PltB WT<br>with $\alpha$ 2-6<br>glycan        | PltB <sup>N29K</sup> apo                      | PltB <sup>N29K</sup><br>with $\alpha$ 2-3<br>glycan | PltB <sup>N29K</sup><br>with $\alpha$ 2-6<br>glycan | PltB <sup>T65I</sup> apo                      | PltB <sup>T65I</sup><br>with $\alpha$ 2-3<br>glycan |
|------------------------------------------------------|-----------------------------------------------|-----------------------------------------------|-----------------------------------------------|-----------------------------------------------------|-----------------------------------------------------|-----------------------------------------------|-----------------------------------------------------|
| <b>PDB ID</b>                                        | <b>6P4M</b>                                   | <b>6P4N</b>                                   | <b>6P4P</b>                                   | <b>6P4Q</b>                                         | <b>6P4R</b>                                         | <b>6P4S</b>                                   | <b>6P4T</b>                                         |
| Glycan bound                                         | 3 in BS1<br>3 in BS2<br>3 in BS3              | 3 in BS1                                      | -                                             | 5 in BS1<br>1 in BS2                                | 5 in BS1                                            | -                                             | 3 in BS1                                            |
| Date collected                                       | 11/11/2018                                    | 3/11/2019                                     | 4/25/2019                                     | 4/26/2019                                           | 4/26/2019                                           | 5/22/2019                                     | 5/24/2019                                           |
| <b>Data collection</b>                               |                                               |                                               |                                               |                                                     |                                                     |                                               |                                                     |
| Space group                                          | P2 <sub>1</sub> 2 <sub>1</sub> 2 <sub>1</sub>       | P2 <sub>1</sub> 2 <sub>1</sub> 2 <sub>1</sub>       | P2 <sub>1</sub> 2 <sub>1</sub> 2 <sub>1</sub> | P2 <sub>1</sub> 2 <sub>1</sub> 2 <sub>1</sub>       |
| Cell dimensions                                      |                                               |                                               |                                               |                                                     |                                                     |                                               |                                                     |
| <i>a</i> , <i>b</i> , <i>c</i> (Å)                   | 68.706,<br>97.745,<br>105.209                 | 68.736,<br>98.483,<br>105.307                 | 60.5091,<br>96.3499,<br>118.368               | 61.0534,<br>96.8941,<br>119.006                     | 60.9162,<br>96.8269,<br>118.928                     | 61.0681,<br>97.4982,<br>118.437               | 61.2823,<br>97.7139,<br>119.076                     |
| $\alpha$ , $\beta$ , $\gamma$ (°)                    | 90, 90, 90                                    | 90, 90, 90                                    | 90, 90, 90                                    | 90, 90, 90                                          | 90, 90, 90                                          | 90, 90, 90                                    | 90, 90, 90                                          |
| Resolution (Å)                                       | 40.00-1.80<br>(1.83-1.80)                     | 50.00-1.70<br>(1.73-1.70)                     | 27.26 -2.00<br>(2.07-2.00)                    | 27.42 - 1.77<br>(1.83-1.77)                         | 27.40-1.87<br>(1.94-1.87)                           | 28.30-2.00<br>(2.07-2.00)                     | 28.40- 2.17<br>(2.25-2.17)                          |
| <i>R</i> <sub>sym</sub> or <i>R</i> <sub>merge</sub> | 9.5%<br>(51.1%)                               | 6.1% (24.9%)                                  | 5.2%<br>(15.3%)                               | 7.0%<br>(31.7%)                                     | 10.0%<br>(38.8%)                                    | 12.5%<br>(58.6%)                              | 12.7%<br>(33.1%)                                    |
| <i>I</i> / $\sigma$ <i>I</i>                         | 21.84 (3.38)                                  | 27.79 (4.83)                                  | 30.55 (5.97)                                  | 15.1 (3.1)                                          | 17.08 (2.71)                                        | 16.90 (1.95)                                  | 12.0 (3.0)                                          |
| Completeness (%)                                     | 99.6%<br>(94.0%)                              | 99.3%<br>(95.8%)                              | 99.4%<br>(99.5%)                              | 99.5 (99.6)                                         | 99.8 (99.9)                                         | 99.3 (99.1)                                   | 99.2 (99.2)                                         |
| Redundancy                                           | 4.6 (3.2)                                     | 6.5 (6.1)                                     | 3.9 (2.9)                                     | 4.0 (3.0)                                           | 3.8 (2.9)                                           | 4.3 (2.8)                                     | 4.1 (3.0)                                           |
| <b>Refinement</b>                                    |                                               |                                               |                                               |                                                     |                                                     |                                               |                                                     |
| Resolution (Å)                                       | 40.00-1.80<br>(1.83-1.80)                     | 50.00-1.70<br>(1.73-1.70)                     | 27.26 -2.00<br>(2.07-2.00)                    | 27.42 - 1.77<br>(1.83-1.77)                         | 27.40-1.87<br>(1.94-1.87)                           | 28.30-2.00<br>(2.07-2.00)                     | 28.40- 2.17<br>(2.25-2.17)                          |
| No. reflection                                       | 66141<br>(3078)                               | 79595 (7234)                                  | 47226<br>(4666)                               | 69147<br>(6872)                                     | 54382<br>(5882)                                     | 88483<br>(8849)                               | 38256 (3738)                                        |
| <i>R</i> <sub>work</sub> / <i>R</i> <sub>free</sub>  | 16.88% /<br>19.32%<br>(19.52%/24.78%)         | 17.66% /<br>19.62%<br>(19.62%/24.85%)         | 18.28% /<br>22.14%<br>(19.82%/26.25%)         | 18.04% /<br>20.33%<br>(20.63%/24.51%)               | 17.94% /<br>0.55%<br>(22.72%/23.56%)                | 19.70% /<br>4.52%<br>(22.93%/29.79%)          | 18.61% /<br>2.72%<br>(19.25%/24.13%)                |
| No. atoms                                            |                                               |                                               |                                               |                                                     |                                                     |                                               |                                                     |
| Protein                                              | 4431                                          | 4562                                          | 4450                                          | 4450                                                | 4450                                                | 4438                                          | 4438                                                |
| Ligand/ion                                           | 414                                           | 138                                           | -                                             | 276                                                 | 230                                                 | -                                             | 138                                                 |
| Water                                                | 359                                           | 295                                           | 265                                           | 371                                                 | 429                                                 | 404                                           | 342                                                 |
| <i>B</i> -factors                                    |                                               |                                               |                                               |                                                     |                                                     |                                               |                                                     |
| Protein                                              | 20.32                                         | 20.11                                         | 12.11                                         | 11.49                                               | 12.57                                               | 17.98                                         | 20.82                                               |
| Ligand/ion                                           | 51.96                                         | 50.82                                         | -                                             | 43.33                                               | 43.43                                               | -                                             | 55.65                                               |
| Water                                                | 25.76                                         | 27.81                                         | 17.28                                         | 15.30                                               | 17.61                                               | 23.61                                         | 24.59                                               |
| R.m.s. deviations                                    |                                               |                                               |                                               |                                                     |                                                     |                                               |                                                     |
| Bond lengths (Å)                                     | 0.007                                         | 0.007                                         | 0.007                                         | 0.006                                               | 0.007                                               | 0.007                                         | 0.008                                               |
| Bond angles (°)                                      | 1.2                                           | 0.9                                           | 0.9                                           | 1.1                                                 | 1.1                                                 | 0.9                                           | 1.0                                                 |

\* Each dataset was collected from a single crystal.

\* Values in parentheses are for highest-resolution shell.  
BS, binding site.

**Table S6. List of plasmids and strains used in this study, related to Key Resource Table.**

| <b>ID</b> | <b>Description</b>                                         | <b>Reference</b>          |
|-----------|------------------------------------------------------------|---------------------------|
| pSB5022   | pET28a-pltB-pltA-cdtB-His <sub>6</sub>                     | (Song et al., 2013)       |
| pSB4987   | pET28a-pltB <sup>S35A</sup> -pltA-cdtB-His <sub>6</sub>    | (Song et al., 2013)       |
| pSB5592   | pET28a-pltB-His <sub>6</sub>                               | (Deng et al., 2014)       |
| pSB5055   | pET28a-pltB <sup>K59A</sup> -pltA-cdtB-His <sub>6</sub>    | (Deng et al., 2014)       |
| pJS0008   | pET28a-pltB <sup>N29K</sup> -pltA-cdtB-His <sub>6</sub>    | This study                |
| pJS0009   | pET28a-pltB <sup>S50G</sup> -pltA-cdtB-His <sub>6</sub>    | This study                |
| pJS0010   | pET28a-pltB <sup>T65I</sup> -pltA-cdtB-His <sub>6</sub>    | This study                |
| pJS0020   | pET28a-pltB-JapltA-cdtB-His <sub>6</sub>                   | This study                |
| pJS0030   | pET28a-JapltB-JapltA-cdtB-His <sub>6</sub>                 | This study                |
| pJS0031   | pET28a-JapltB-pltA-cdtB-His <sub>6</sub>                   | This study                |
| pJS0032   | pET28a-pltB <sup>Q75A</sup> -pltA-cdtB-His <sub>6</sub>    | This study                |
| pJS0033   | pET28a-pltB <sup>I107A</sup> -pltA-cdtB-His <sub>6</sub>   | This study                |
| pJS0034   | pET28a-pltB <sup>W108A</sup> -pltA-cdtB-His <sub>6</sub>   | This study                |
| pJS0035   | pET28a-pltB <sup>T109A</sup> -pltA-cdtB-His <sub>6</sub>   | This study                |
| pJS0036   | pET28a-pltB <sup>Y110A</sup> -pltA-cdtB-His <sub>6</sub>   | This study                |
| pJS0037   | pET28a-pltB <sup>F113A</sup> -pltA-cdtB-His <sub>6</sub>   | This study                |
| pJS0038   | pET28a-pltB <sup>E24A</sup> -pltA-cdtB-His <sub>6</sub>    | This study                |
| pJS0039   | pET28a-pltB <sup>D28A</sup> -pltA-cdtB-His <sub>6</sub>    | This study                |
| pJS0040   | pET28a-pltB <sup>D48A</sup> -pltA-cdtB-His <sub>6</sub>    | This study                |
| pJS0052   | pET28a-pltB <sup>N29K</sup> -His <sub>6</sub>              | This study                |
| pJS0054   | pET28a-pltB <sup>T65I</sup> -His <sub>6</sub>              | This study                |
| JS0001    | Wild-type <i>S. Javiana</i> (isolate FSL S5-0395)          | (den Bakker et al., 2011) |
| JS0004    | Δ <i>Javiana</i> toxin islet                               | This study                |
| JS0005    | Δ <i>Javiana</i> toxin islet :: <i>Javiana</i> toxin islet | This study                |

**Table S7. List of primers used in this study, related to Star Methods.**

| <b>Oligomers used for Figure 2C</b> |                                                                     |
|-------------------------------------|---------------------------------------------------------------------|
| Genes                               | Sequences (5'-3')                                                   |
| ST3GAL1                             | Forward TTGGAGGACGACACCTACCGAT<br>Reverse CACCACTCTGAACAGCTCCTTG    |
| ST3GAL2                             | Forward TCCGACTGGTTTGACAGCCACT<br>Reverse CTTCTCCAGCACCTCATTGGTG    |
| ST3GAL3                             | Forward CGAATCCTCAACCCATATTTTCATCC<br>Reverse CACTGCCACACTGCCAAG    |
| ST3GAL4                             | Forward GGCTGGTGCCAGTATGAC<br>Reverse CCACCCTGACTGGATCTCG           |
| ST3GAL5                             | Forward AGAGCCTCAGTCAAGGTTCTGG<br>Reverse GAGGTCATATCCAAAACCCGCC    |
| ST3GAL6                             | Forward CTGACCTCAAGAGTCCTTTGCAC<br>Reverse TCTTGAGTCAAGTTGATTACGAGG |
| ST6GAL1                             | Forward CTGAATGGGAGGGTTATCTGCC<br>Reverse ACCTCAGGACTGCGTCATGATC    |
| <b>Oligomers used for Figure 2F</b> |                                                                     |
| ST3GAL3                             | Forward CGCAAGTGGGCTAGAATCC<br>Reverse CATTGCCACGATGATGCAG          |
| ST3GAL4                             | Forward CATCCTGAGTGATAAGAAGCGG<br>Reverse GGCAGGCTCAGCAGTTTG        |
| $\beta$ -actin                      | Forward AGAGCTACGAGCTGCCTGAC<br>Reverse AGCACTGTGTTGGCGTACAG        |
